# Supplementary material
Source: PubMed Central journal article supplement (PMC3752263)
Supplement: 1310327110_pnas.201310327SI.pdf [file 1310327110_pnas.201310327SI.pdf]

# Supporting Information

Seven et al. 10.1073/pnas.1310327110

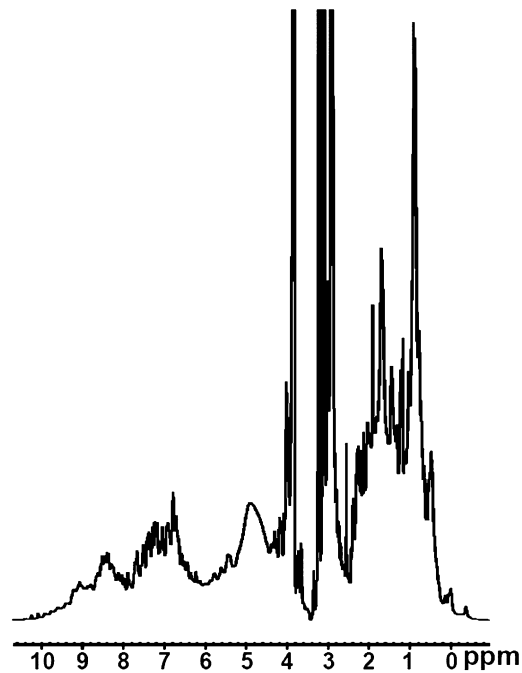

Fig. S1. <sup>1</sup>H NMR spectrum of 800 μM <sup>15</sup>N-C<sub>2</sub>AB in 50 mM Mes (pH 6.3) containing 150 mM NaCl and 100 mM Ca<sup>2+</sup>.

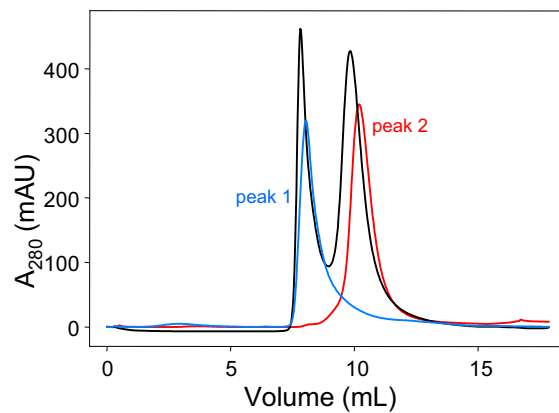

Fig. S2. Peaks 1 and 2 in the gel filtration profile of Fig. 3A correspond to stable species. The black curve shows the gel filtration profile on an analytical Superdex 75 10/300 column of an InC<sub>2</sub>AB sample that was purified by our usual procedure, including the benzonase treatment, but without ion exchange chromatography step. A portion of the same sample was injected into a preparative Superdex 75 16/60 column; the fractions corresponding to peaks 1 and 2 were collected and then injected into the analytical Superdex 75 10/300 column (blue and red curves, respectively).

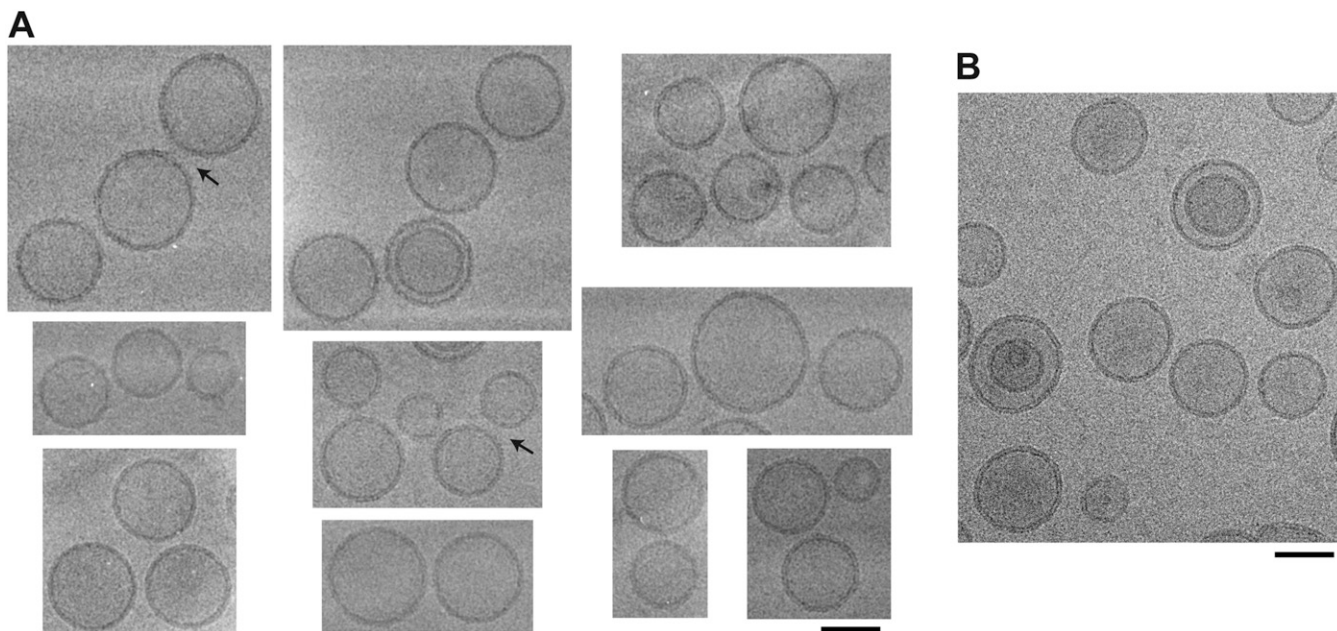

**Fig. 53.** Cryo-EM analysis of liposome clustering by InC<sub>2</sub>AB. Additional images of the same experiments described in Fig. 4. (A) The arrows point to interfaces with intermembrane distances of 8–10 nm and what appears to be electron density between them that could correspond to InC<sub>2</sub>AB oligomers. (B) Example of loosely clustered vesicles. (Scale bars: 100 nm.)



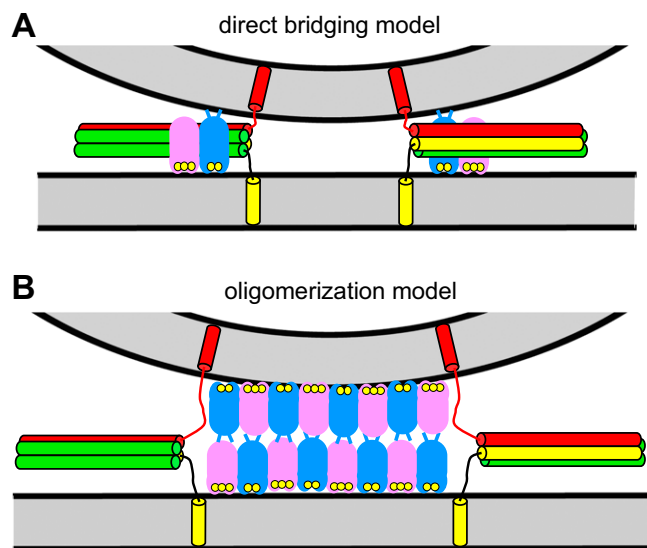

**Fig. S6.** Mechanistic implications of the direct bridging and oligomerization models. Both diagrams show the soluble N-ethylmaleimide sensitive factor adaptor protein receptor (SNARE) complex (syntaxin-1 in yellow, SNAP-25 in green, and synaptobrevin in red) bridging the synaptic vesicle and plasma membranes (shown in gray), and are intended to illustrate potential relative orientations of the synaptotagmin-1 C<sub>2</sub> domains (C<sub>2</sub>A domain in pink, C<sub>2</sub>B domain in blue, Ca<sup>2+</sup> ions in yellow) with respect to the membranes and the SNARE complex. (A) In the direct bridging model, synaptotagmin-1 could bind simultaneously to the SNARE complex and the two membranes, which would allow a natural cooperation between synaptotagmin-1 and the SNAREs in bringing the membranes together to induce membrane fusion (1, 2). (B) In the oligomerization model, formation of a single synaptotagmin-1 oligomer between the membranes would hinder membrane fusion. It could be envisaged that multiple synaptotagmin-1 oligomers could form around the fusion pore area and each oligomer could bind to a SNARE complex, but neurotransmitter release is believed to normally involve a minimum of three SNARE complexes (3), and therefore this model would require an unrealistic number of synaptotagmin-1 molecules. Note that the transmembrane region of synaptotagmin-1 and the linker from this region to the C<sub>2</sub>A domain are not shown for simplicity. Because this linker spans more than 50 residues and is highly flexible, it is expected to allow a very wide range of orientations of the C<sub>2</sub> domains with respect to the two membranes.

1. Araç D, et al. (2006) Close membrane-membrane proximity induced by Ca<sup>2+</sup>-dependent multivalent binding of synaptotagmin-1 to phospholipids. *Nat Struct Mol Biol* 13(3):209–217.
2. Dai H, Shen N, Araç D, Rizo J (2007) A quaternary SNARE-synaptotagmin-Ca<sup>2+</sup>-phospholipid complex in neurotransmitter release. *J Mol Biol* 367(3):848–863.
3. Mohrmann R, de Wit H, Verhage M, Neher E, Sørensen JB (2010) Fast vesicle fusion in living cells requires at least three SNARE complexes. *Science* 330(6003):502–505.
